# Supplementary material
Source: PubMed Central journal article supplement (PMC7927325)
Supplement: jcsm.8914.ds001.pdf [file jcsm.8914.ds001.pdf]

Table S1: OSA diagnosis (ICD-9-CM codes) and treatment/adherence (PAP HCPCS codes) from claims files.

|                        |                                                                                                                                                                                                                                                                                                                                                                                                                                                                                          |
|------------------------|------------------------------------------------------------------------------------------------------------------------------------------------------------------------------------------------------------------------------------------------------------------------------------------------------------------------------------------------------------------------------------------------------------------------------------------------------------------------------------------|
| OSA Diagnosis          | 327.23 (OSA)<br>327.20 (organic sleep apnea, unspecified)<br>780.57 (unspecified sleep apnea)<br>780.53 (hypersomnia with sleep apnea, unspecified)                                                                                                                                                                                                                                                                                                                                      |
| INITIAL "Treatment"    | E0601 (CPAP, auto CPAP)<br>E0470 (ResMed S9VPAP Adapt)<br>E0470 (Bilevel, auto bilevel)<br>E0471 (Bilevel with backup rate)<br>E0562 (heated humidifier)<br>A7034 (nasal mask)<br>A7035 (headgear)<br>A7033 (nasal pillows)<br>A7032 (nasal cushion)<br>A7031 (full cushion)<br>A7028 (oral cushion)<br>A7027 (comb oral/nasal mask)<br>A7036 (chin strap)<br>A7037 (Tubing)<br>A4604 (heated tubing)<br>A7039 (washable filters)<br>A7038 (disposable filters)<br>A7046 (humid chamber) |
| Subsequent "Adherence" | A7035 (headgear)<br>A7034 (nasal mask)<br>A7033 (nasal pillows)<br>A7032 (nasal cushion)<br>A7031 (full cushion)<br>A7028 (oral cushion)<br>A7027 (comb oral/nasal mask)<br>A7036 (chin strap)<br>A7037 (Tubing)<br>A4604 (heated tubing)<br>A7039 (washable filters)<br>A7038 (disposable filters)<br>A7046 (humid chamber)                                                                                                                                                             |
